# Supplementary material for: The FunGenES Database: A Genomics Resource for Mouse Embryonic Stem Cell Differentiation
Source: PubMed Central journal article supplement (PMC2731164; doi:10.1371/journal.pone.0006804), 2009-09-03
Supplement: pone.0006804.s005.pdf [file pone.0006804.s005.pdf]

# Supplemental File S5

## Experimental data sets used in Time Series

The samples from the 26 experimental conditions that represent untreated states without additional stimuli are listed below.

| Experiment condition    | Day of differentiation |
|-------------------------|------------------------|
| CNRS-UMR-5164_h48liflif | 0                      |
| AVEF-1_0es              | 0                      |
| IMBB-1_CGR8-LIF-TSA00   | 0                      |
| IPK-1_Pax4-ESC-1        | 0                      |
| IPK-1_R1-ESC-1          | 0                      |
| INS-1_Cre-ER-CTL        | 0                      |
| INS-1_STAT3-ER-CTL      | 0                      |
| INS-2_CGR8              | 0                      |
| INS-2_E14TG2a           | 0                      |
| INS-2_R1                | 0                      |
| UKOE-1_00d              | 0                      |
| UOB-1_DMSO              | 0                      |
| UOB-1_LY                | 0                      |
| CNRS-UMR-5164_h24---lif | 1                      |
| UKOE-1_01d              | 1                      |
| UKOE-1_02d              | 2                      |
| CNRS-UMR-6543_day03     | 3                      |
| AVEF-1_eb3              | 3                      |
| UKOE-1_03d              | 3                      |
| AVEF-1_eb4              | 4                      |
| UKOE-1_04d              | 4                      |
| UKOE-1_05d              | 5                      |
| CNRS-UMR-6543_day06-0   | 6                      |
| AVEF-1_eb6ctl           | 6                      |
| UKOE-1_06d              | 6                      |
| UKOE-1_07d              | 7                      |
